# Supplementary material for: Improving KNbO3 photocatalytic activity under visible light
Source: Royal Society of Chemistry journal article supplement (doi:10.1039/c5ra26079e), 2016-01-01
Supplement: c5ra26079e1.pdf [file c5ra26079e1.pdf]

## Supporting Materials

### Improving Photocatalytic Activity of $\text{KNbO}_3$ under Visible Light

Brindaban Modak and Swapan K. Ghosh\*

Theoretical Chemistry Section, Bhabha Atomic Research Centre  
and Homi Bhabha National Institute, Mumbai – 400 085, India

*Email: skghosh@barc.gov.in*

*Phone: 91-22-25595092*

*Fax: 91-22-25505151*

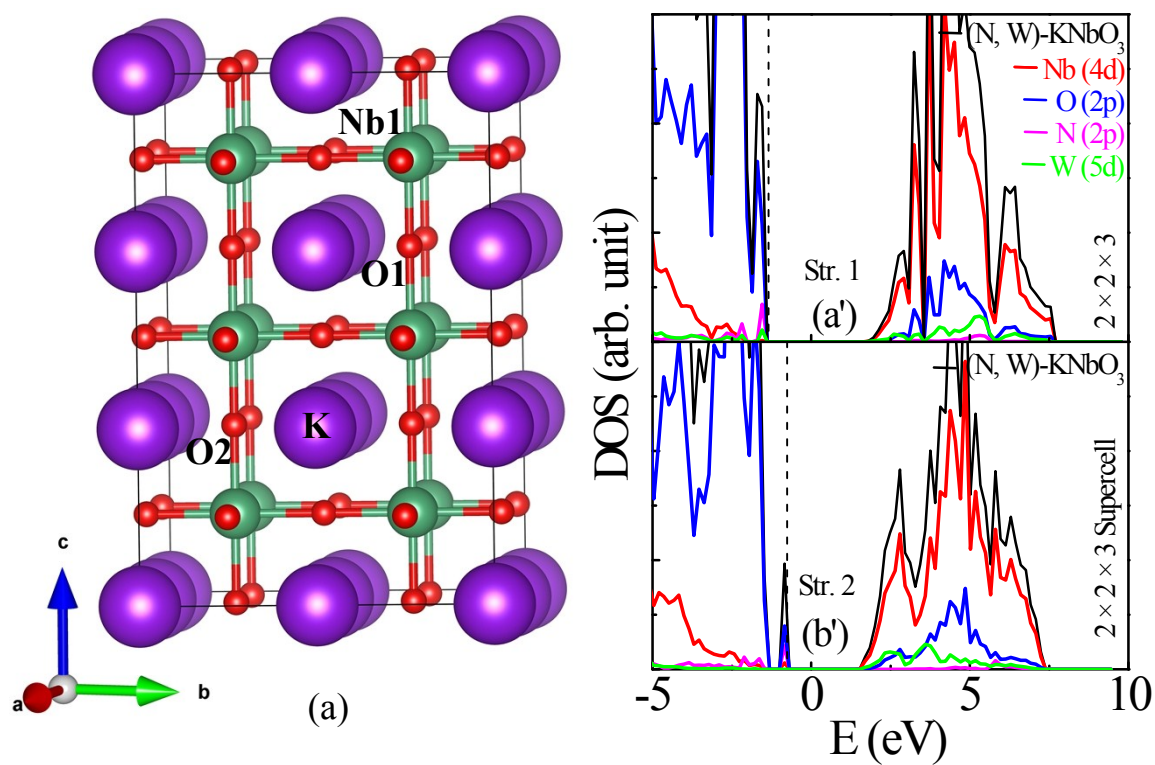

**Figure S1:** A  $2 \times 2 \times 3$  supercell of  $\text{KNbO}_3$  cubic crystal structure (a). Number indicates position of the dopant element. Density of states of (N, W)-codoped  $\text{KNbO}_3$  (N: 2.78%, W: 8.33%) using Str. 1 (a') and Str. 2 (b') for  $2 \times 2 \times 3$  supercell. The vertical line in the density of states plot indicates the Fermi level.

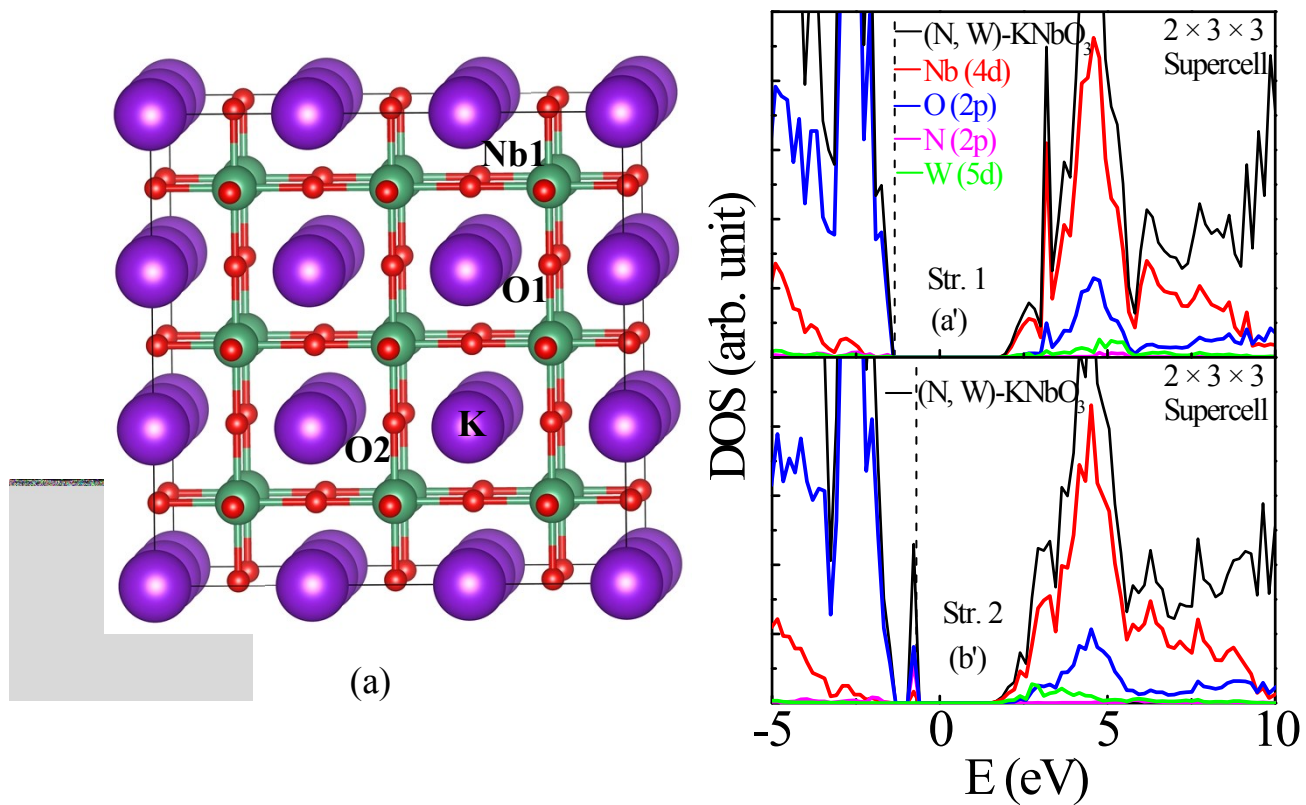

**Figure S2:** A  $2 \times 3 \times 3$  supercell of  $\text{KNbO}_3$  cubic crystal structure (a). Number indicates position of the dopant element. Density of states of (N, W)-codoped  $\text{KNbO}_3$  (N: 1.85%, W: 5.55%) using Str. 1 (a') and Str. 2 (b') for  $2 \times 3 \times 3$  supercell. The vertical line in the density of states plot indicates the Fermi level.
